# Supplementary material
Source: PubMed Central journal article supplement (PMC7261793)
Supplement: supp_RA119.012005_157270_3_supp_513294_q8yb1c.pdf [file supp_RA119.012005_157270_3_supp_513294_q8yb1c.pdf]

**The mRNA encoding the JUND tumor suppressor detains nuclear RNA-binding proteins to assemble polysomes that are unaffected by mTOR**

**Gatkrushna Singh<sup>1</sup>, Sarah E. Fritz<sup>2\*</sup>, Bradley Seufzer<sup>1</sup>, Kathleen Boris-Lawrie<sup>1,2\*</sup>**

**Table of Contents**

- I. Figure and Figure Legends S1-S4
- II. Table and Table Legends S1-S4

## I. Figure and Figure Legends S1-S4

### Figure S1

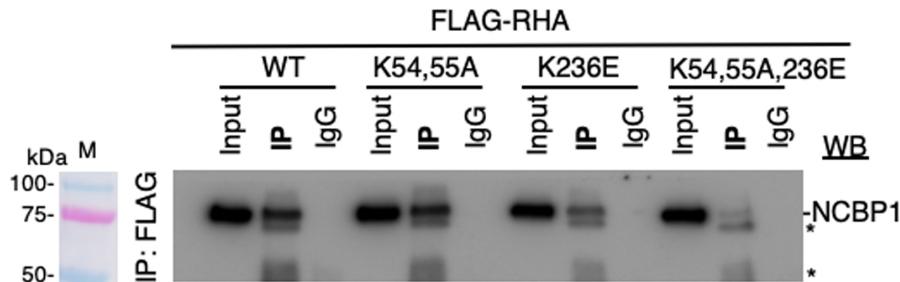

### Figure S1. FLAG-RHA interaction with NCBP1 (prolonged exposure)

The prolonged exposure of the WB shown in Fig. 4C identifies NCBP1 in the FLAG-immunoprecipitates. The antiserum detected the specific proteins on the immunoblots, as shown relative to the pre-stained molecular mass markers (M). The same image of the molecular mass markers was used for each panel.

### Figure S2

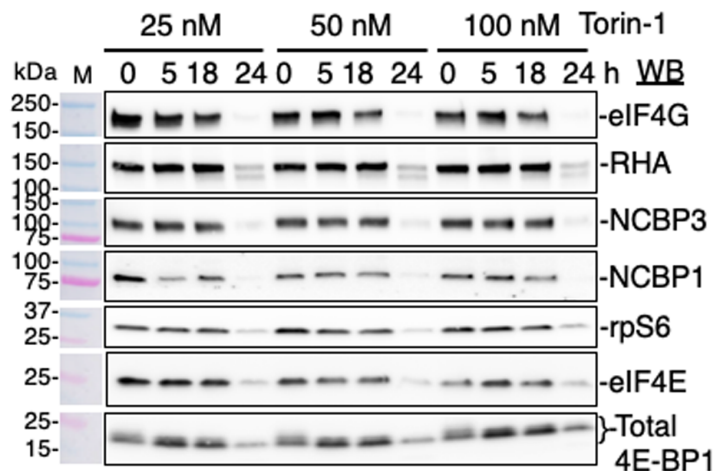

### Figure S2. Standardization of the dose and the incubation period for activation of 4E-BP1 by Torin-1

HEK293 cells were exposed to 0, 25, 50 or 100 nM mTOR inhibitor Torin-1 for 0, 5 18 or 24 h. The cells were washed once with ice-cold 1× PBS and lysed in RIPA buffer. The cell lysates (20  $\mu$ g) were immunoblotted with the indicated antisera. The antiserum detected the specific proteins on the immunoblots, as shown relative to the pre-stained molecular mass markers (M). The same image of the molecular mass markers was used for each panel.

Figure S3

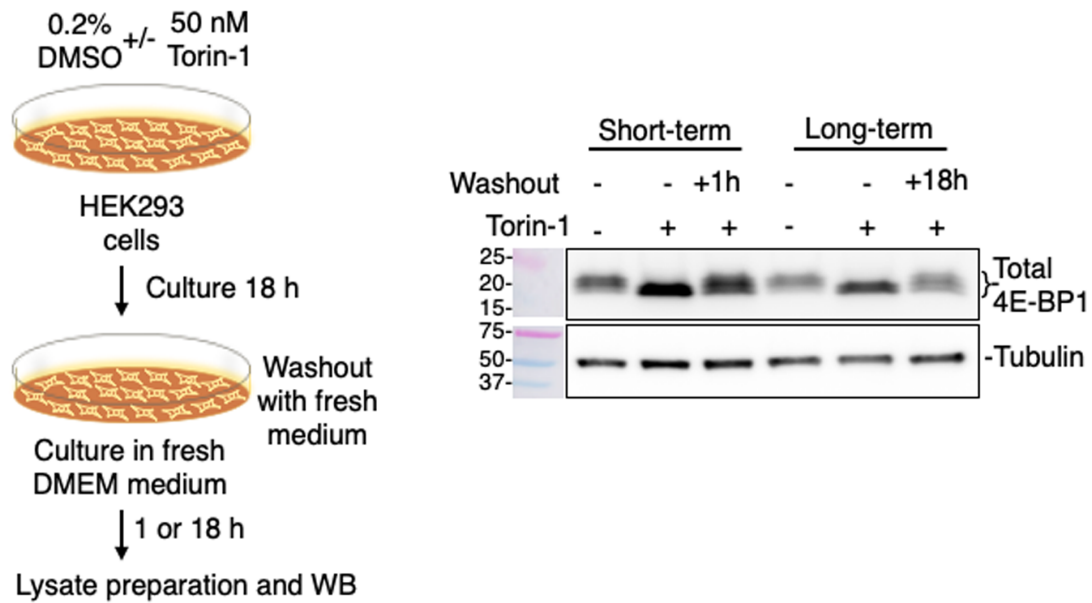

**Figure S3. Demonstration of 4E-BP1 levels before and after Torin-1 treatment**

The cartoon on the left outlines the protocol of Torin-1 treatment and washout. HEK293 cells treated with 50 nM Torin-1 for 18 h and the washed with fresh medium to eliminate Torin-1. After 1 or 18 h in Torin-1 free medium, cells were collected and lysates were analyzed by WB with the indicated antisera. The antiserum detected the specific proteins on the immunoblots, as shown relative to the pre-stained molecular mass markers (M). The same image of the molecular mass markers was used for each panel.

Figure S4

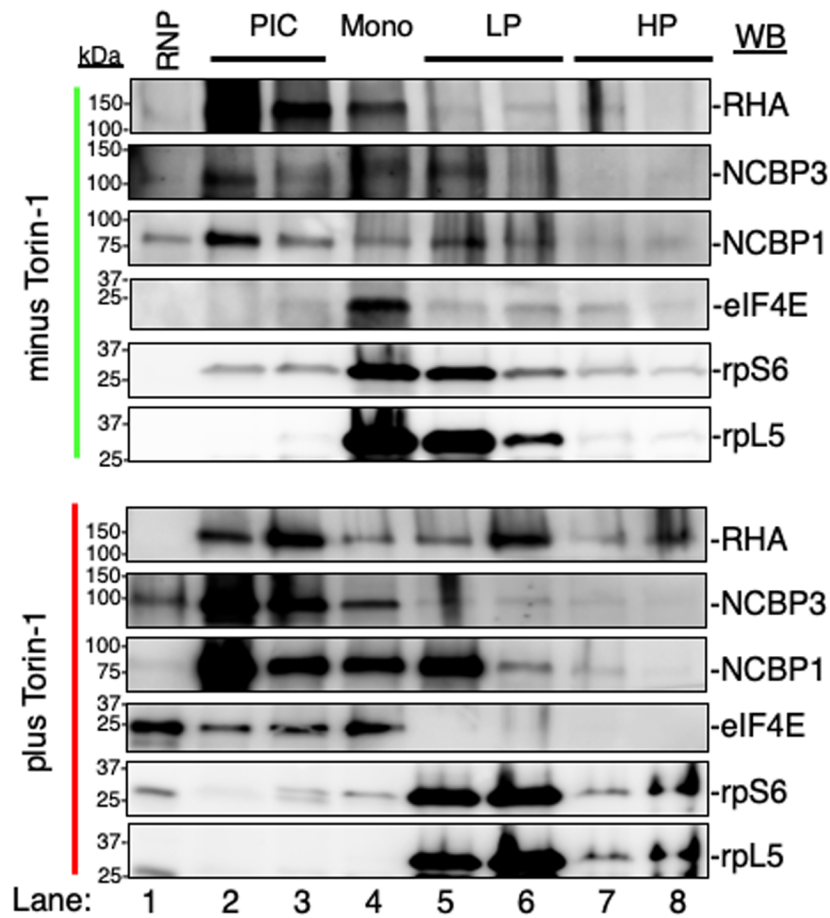

**Figure S4. The distribution of proteins in fractions of sucrose density gradients**

The HEK293 cells treated minus or plus 50 nM Torin-1 for 18 h were lysed and cyto lysates were fractionated on sucrose gradients. Proteins in the gradient fractions were precipitated and analyzed by WB with the indicated antiserum. Lane 1: ribonucleoprotein (RNP); lane 2 and 3: pre-initiation complex (PIC); lane 4: monosome (mono); lane 5 and 6: light polysomes (LP); lane 7 and 8: heavy polysomes (HP). The antiserum detected the specific proteins on the immunoblots, as shown relative to the pre-stained molecular mass markers (M). The same image of the molecular mass markers was used for each panel.

## II. Table and Table Legends S1-S4

### Table S1

Table S1 is a spreadsheet.

#### Table S1. Densitometry quantification of WBs

The WBs were quantified by ImageJ and the densitometry of the individual bands has been presented according to the layout of the corresponding figure. Red font represents positive co-IP. The ratio of the immunoprecipitated protein was calculated relative to the input lysate.

### Table S2

| <b>Immunoprecipitation</b> |                |                    |
|----------------------------|----------------|--------------------|
| <b>Antibody</b>            | <b>Source</b>  | <b>Catalog No.</b> |
| DHX9/RHA                   | Vaxron         | PA-001             |
| DDX3                       | Bethyl         | A300-474A          |
| NCBP1                      | Bethyl         | A301-794A          |
| NCBP2                      | Proteintech    | 11950-I-AP         |
|                            | Bethyl         | A302-553AT         |
| NCBP3                      | Proteintech    | 24384-I-AP         |
| eIF4E                      | Santa Cruz     | SC-9976AC          |
|                            | Sigma          | E5906              |
| eIF4G                      | Cell Signaling | #2498S             |
| FLAG                       | Sigma          | F7425              |
|                            | Agilent        | 200473             |
|                            | Sigma          | F1804              |

#### Table S2. Immunoprecipitation antibodies

These antibodies were used for immunoprecipitation of the candidate proteins.

**Table S3**

| <b>Western blot</b> |                |                    |                 |
|---------------------|----------------|--------------------|-----------------|
| <b>Antibody</b>     | <b>Source</b>  | <b>Catalog No.</b> | <b>Dilution</b> |
| DHX9/RHA            | Vaxxon         | PA-001             | 1:7500          |
|                     | Sigma          | WH0001660M1        | 1:1000          |
| DDX3                | Bethyl         | A300-474A          | 1:1000          |
|                     | Santa Cruz     | SC-81247           |                 |
| NCBP1               | Bethyl         | A301-793A          | 1:1000          |
|                     | Cell Signaling | D72227             |                 |
|                     | Santa Cruz     | SC-271304          |                 |
| NCBP2               | Proteintech    | 11950-I-AP         | 1:200           |
|                     | Santa Cruz     | SC-137123          | 1:100           |
|                     | Bethyl         | A302-553AT         | 1:500           |
|                     | Sigma          | SAB4500912         | 1:500           |
| NCBP3               | Proteintech    | 24384-I-AP         | 1:1000          |
| eIF4E               | Santa Cruz     | SC-9976            | 1:1000          |
|                     | Sigma          | E5906              |                 |
|                     | Cell Signaling | #9742S             |                 |
| eIF4G               | Cell Signaling | #2498S             | 1:1000          |
| 4E-BP1              | Cell Signaling | #9452S             | 1: 500          |
|                     |                | #9644S             |                 |
| PABPC1              | Abcam          | ab6125             | 1:1000          |
| rpL5                | Bethyl         | A303-933A          | 1:1000          |
| rpS6                | Cell Signaling | #2217              | 1:1000          |
| JUND                | Santa Cruz     | SC-271938          | 1:500           |
| FLAG                | Sigma          | F7425              | 1:5000          |
|                     | Sigma          | F1804              |                 |
|                     | Agilent        | 200473             | 1:1000          |
| GAPDH               | Abcam          | ab-181602          | 1:1000          |
|                     | Santa Cruz     | SC-47724           | 1:500           |
|                     | Proteintech    | 10494-I AP         | 1:1000          |
|                     |                | 60004-I-Ig         |                 |
| Tubulin             | Santa Cruz     | SC-23948           | 1:1000          |

**Table S3. Western blot antibodies**

These antibodies were used for WB of the candidate proteins.

**Table S4**

| <b>Name</b>                             | <b>Gene</b>     | <b>Sequence</b>                          |
|-----------------------------------------|-----------------|------------------------------------------|
| Quantitative real time PCR primer pairs |                 |                                          |
| KB1628                                  | junD sense      | 5' GCC TGG AGG AGA AAG TGA AG 3'         |
| KB1629                                  | junD antisense  | 5' GGC TGA GGA CTT TCT GCT TG 3'         |
| KB2320                                  | ncbp3 sense     | 5' GCA GGA AGA CAG TTC AGA TG 3'         |
| KB2321                                  | ncbp3 antisense | 5' ACT TCT TCT GGC TGC TCC AA 3'         |
| KB2326                                  | rha sense       | 5' GCC AGA GAC TTT GTT AAC TAT 3'        |
| KB2327                                  | rha antisense   | 5' CAT TTG CTG TAG TGT CAG GAG 3'        |
| KB1371                                  | gapdh sense     | 5' CAT CAA TGA CCC CTT CAT TGA C 3'      |
| KB1372                                  | gapdh antisense | 5' CGC CCC ACT TGA TTT TGG A 3'          |
| KB2399                                  | cjun sense      | 5' TGA CTG CAA AGA TGG AAA CGA CCT TC 3' |
| KB2400                                  | cjun antisense  | 5' CAG GGT CAT GCT CTG TTT CAG GAT C 3'  |

**Table S4. Oligonucleotide sequence used to identify candidate genes**

The oligonucleotides were synthesized from integrated DNA technology (IDT) and used in RT-qPCR for quantification of the candidate genes.
